# Supplementary material for: Evaluating the Factor Structure of Each Facet of the Five Facet Mindfulness Questionnaire
Source: Springer Nature journal article supplement (doi:10.1007/s12671-019-01235-2), 2019-10-07
Supplement: MOESM1 [file 17248716]

**Supplementary Material**

**Review of Articles Published in *Mindfulness* in 2017**

We queried Web of Science for all articles citing Baer et al. (2006), the article reporting the initial development of the FFMQ. We then queried Web of Science for all articles published in *Mindfulness* in 2017. There was a total of 55 articles that appeared on both lists. 19 of these 55 articles cited Baer et al. (2006) for a reason other than the FFMQ and did not use the FFMQ in any analysis. The remaining 36 articles were reviewed by one of the manuscript authors and the way in which they used the FFMQ in analyses was coded. Results of this coding procedure are reported in Table S1.

**Results of Five-Factor Models Fit to Entire FFMQ**

This section expands on the results of five-factor models described in the Preliminary Analyses section of manuscript.

**Confirmatory factor analysis.** Confirmatory factor analyses indicated acceptable fit of the five-factor model in the primary (MTurk) sample. Table 2 reports the fit statistics of the five-factor model when items were modeled as categorical and as continuous. When items were modeled as continuous (ML estimator), RMSEA was 0.066, CFI was 0.89, and SRMR was 0.067. When items were modeled as categorical (WLSMV estimator), RMSEA was 0.075, CFI was 0.94, and WRMR was 1.91. Factor intercorrelations were positive and ranged from 0.21 to 0.56 in the categorical model, with the exception of observing and nonjudging (these correlated at -0.10, similar to the value of -0.07 reported in Baer et al., 2006). Intercorrelations were very similar when items were modeled as continuous. Factor loadings ranged from 0.60 to 0.92 in the categorical model, and from 0.54 to 0.96 in the continuous model. In both cases, more than half of factor loadings were greater than 0.80.

**Exploratory factor analysis.** Exploratory factor analyses recovered the five-factor solution in the primary (MTurk) sample. Parallel analysis suggested a five-factor solution (eigenvalues of 11.93, 5.18, 2.44, 2.07, and 1.70). When an exploratory factor analysis was fit with five factors, all items loaded strongly on the hypothesized factor (i.e., the eight describing items loaded together on a describing factor), with minimal cross-loadings (Table S2). One exception was item number 36 (“I pay attention to how my emotions affect my thoughts and behavior”), which loaded most highly on observing (its hypothesized factor, +0.45) but also loaded substantially on describing (+0.37) and nonjudging (−0.23). Each factor accounted for between 8 and 15 percent of the variance, together explaining 64% of the variance.

**Replication sample.** Results in the replication (clinical) sample were generally consistent with those from the primary (MTurk) sample. Confirmatory models indicated acceptable fit of the five-factor model when considering the RMSEA (0.075 in continuous models; 0.097 in categorical models), but poor fit when considering the CFI (0.791 in continuous [ML estimator] models; 0.753 in categorical [WLSMV estimator] models) (Table 2). Parallel analysis suggested a five-factor solution (eigenvalues of 8.44, 6.25, 1.50, 1.17, and 1.08). When an exploratory factor analysis was fit with five factors, all items loaded most strongly on the hypothesized factor, but there were more cross-loadings than in the primary sample (Table S3). There were only 2 items with a cross-loading greater than 0.20 in the primary sample, but there were 16 items with a cross-loading greater than 0.20 in the replication sample. This may be due to the smaller sample size (*N* = 324 vs. 522). Each of the five factors accounted for between 8 and 12 percent of the variance, together explaining 51% of the variance.

**Summary.** Both confirmatory and exploratory factor analyses supported the five-factor FFMQ model found in previously published studies. Model fit was worse in the replication sample than in the primary sample but still provided reasonable support for the five-factor model.

**Reliability in Bifactor Models (Omega Hierarchical)**

In the primary sample, 86% of the common variance was explained by the latent acting with awareness construct and 9% was explained by the orthogonal method factor—these numbers were 77% and 12% in the replication sample. These values are omega hierarchical (omegaH) and were calculated using the method described by Reise, Bonifay, and Haviland (Eq. 4; 2013).

References

Baer, R. A., Smith, G. T., Hopkins, J., Krietemeyer, J., & Toney, L. (2006). Using self-report assessment methods to explore facets of mindfulness. *Assessment*, *13*, 27–45.

Benjamini, Y., & Hochberg, Y. (1995). Controlling the false discovery rate: A practical and powerful approach to multiple testing. *Journal of the Royal Statistical Society. Series B (Methodological)*, *57*, 289–300.

Bond, F. W., Hayes, S. C., Baer, R. A., Carpenter, K. M., Guenole, N., Orcutt, H. K., … Zettle, R. D. (2011). Preliminary psychometric properties of the Acceptance and Action Questionnaire–II: A revised measure of psychological inflexibility and experiential avoidance. *Behavior Therapy*, *42*, 676–688.

Feinn, R., Tennen, H., & Kranzler, H. R. (2006). Psychometric properties of the Short Index of Problems as a measure of recent alcohol‐related problems. *Alcoholism: Clinical and Experimental Research*, *27*, 1436–1441.

Flannery, B. A., Volpicelli, J. R., & Petinnati, M. H. (2006). Psychometric properties of the Penn Alcohol Craving Scale. *Alcoholism: Clinical and Experimental Research*, *23*, 1289–1295.

Reise, S. P., Bonifay, W. E., & Haviland, M. G. (2013). Scoring and modeling psychological measures in the presence of multidimensionality. *Journal of Personality Assessment*, *95*, 129–140.

Stockwell, T., Murphy, D., & Hodgson, R. (2010). The severity of alcohol dependence questionnaire: Its use, reliability and validity. *British Journal of Addiction*, *78*, 145–155.

Williams, E. J. (1959). The comparison of regression variables. *Journal of the Royal Statistical Society. Series B (Methodological)*, *21*, 396–399.

Table S1

*Coding of Studies from Mindfulness Journal*

| **Authors** | **Title** | **Used Individual FFMQ Facets as Variables in Any Analysis?** | **Used Total Score Across FFMQ Facets as Variable in Any Analysis?** | **Had Any FFMQ Variable Indicating a Latent Variable?** |
| --- | --- | --- | --- | --- |
| Andreu, Catherine I.; Moenne-Loccoz, Cristobal; Lopez, Vladimir; Slagter, Heleen A.; Franken, Ingmar H. A.; Cosmelli, Diego | Behavioral and Electrophysiological Evidence of Enhanced Performance Monitoring in Meditators | Yes | No | No |
| Blanke, Elisabeth S.; Brose, Annette | Mindfulness in Daily Life: a Multidimensional Approach | Yes | No | Yes |
| Blankespoor, Roos J.; Schellekens, Melanie P. J.; Vos, Sandra H.; Speckens, Anne E. M.; de Jong, Brigit A. | The Effectiveness of Mindfulness-Based Stress Reduction on Psychological Distress and Cognitive Functioning in Patients with Multiple Sclerosis: a Pilot Study | Yes | No | No |
| Caltabiano, Giuseppina; Martin, Graham | Mindless Suffering: the Relationship Between Mindfulness and Non-Suicidal Self-Injury | Yes | Yes | No |
| Carswell, Jessica; Frewen, Paul | Experiences of Psychopathology Distract from Focused Attention During Mindfulness Meditation: Assessment in Relation to Meditation Breath Attention Scores in Mental Health Help-Seeking Participants | Yes | No | No |
| Christie, Alison M.; Atkins, Paul W. B.; Donald, James N. | The Meaning and Doing of Mindfulness: The Role of Values in the Link Between Mindfulness and Well-Being | Yes | No | No |
| Clerkin, Elise M.; Sarfan, Laurel D.; Parsons, E. Marie; Magee, Joshua C. | Mindfulness Facets, Social Anxiety, and Drinking to Cope with Social Anxiety: Testing Mediators of Drinking Problems | Yes | No | No |
| Cohen, Jonah N.; Jensen, Dane; Stange, Jonathan P.; Neuburger, Mark; Heimberg, Richard G. | The Immediate and Long-Term Effects of an Intensive Meditation Retreat | Yes | Yes | No |
| de Carvalho, Joana Sampaio; Pinto, Alexandra Marques; Maroco, Joao | Results of a Mindfulness-Based Social-Emotional Learning Program on Portuguese Elementary Students and Teachers: a Quasi-Experimental Study | Yes | No | No |
| Di Francesco, Simona Arianna; Simione, Luca; Fernanda Lopez-Ramon, Maria; Belardinelli, Marta Olivetti; Lupianez, Juan; Raffone, Antonino | Dispositional mindfulness facets predict the efficiency of attentional networks | Yes | No | No |
| Freudenthaler, Laura; Turba, Josephine D.; Tran, Ulrich S. | Emotion Regulation Mediates the Associations of Mindfulness on Symptoms of Depression and Anxiety in the General Population | Yes | Yes | No |
| Hadash, Yuval; Lichtash, Yael; Bernstein, Amit | Measuring Decentering and Related Constructs: Capacity and Limitations of Extant Assessment Scales | Yes | No | No |
| Hanley, Adam W.; Garland, Eric L. | The Mindful Personality: a Meta-analysis from a Cybernetic Perspective | Yes | Yes | No |
| Hildebrandt, Lea K.; McCall, Cade; Singer, Tania | Differential Effects of Attention-, Compassion-, and Socio-Cognitively Based Mental Practices on Self-Reports of Mindfulness and Compassion | Yes | No | No |
| Huijbers, Marloes J.; Crane, Rebecca S.; Kuyken, Willem; Heijke, Lot; van den Hout, Ingrid; Donders, A. Rogier T.; Speckens, Anne E. M. | Teacher Competence in Mindfulness-Based Cognitive Therapy for Depression and Its Relation to Treatment Outcome | No | Yes | No |
| Iani, Luca; Lauriola, Marco; Cafaro, Valentina; Didonna, Fabrizio | Dimensions of Mindfulness and Their Relations with Psychological Well-Being and Neuroticism | Yes | Yes | No |
| Iida, Masumi; Shapiro, Alyson F. | The Role of Mindfulness in Daily Relationship Process: Examining Daily Conflicts and Relationship Mood | No | Yes | No |
| Josefsson, Torbjorn; Ivarsson, Andreas; Lindwall, Magnus; Gustafsson, Henrik; Stenling, Andreas; Boroy, Jan; Mattsson, Emil; Carnebratt, Jakob; Sevholt, Simon; Falkevik, Emil | Mindfulness Mechanisms in Sports: Mediating Effects of Rumination and Emotion Regulation on Sport-Specific Coping | No | Yes | No |
| Kaplan, Joshua Benjamin; Bergman, Aaron L.; Christopher, Michael; Bowen, Sarah; Hunsinger, Matthew | Role of Resilience in Mindfulness Training for First Responders | Yes | No | No |
| Keng, Shian-Ling; Liew, Kenny Wei Lun | Trait Mindfulness and Self-Compassion as Moderators of the Association Between Gender Nonconformity and Psychological Health | Yes | Yes | No |
| Kimmes, Jonathan G.; Durtschi, Jared A.; Fincham, Frank D. | Perception in Romantic Relationships: a Latent Profile Analysis of Trait Mindfulness in Relation to Attachment and Attributions | Yes | No | No |
| Krzeczkowski, John E.; Robb, Sean A.; Good, Dawn E. | Trait Mindfulness Is Associated with Lower Post-Injury Psychological Symptoms Following a Mild Head Injury | Yes | No | No |
| Lenger, Katherine A.; Gordon, Cameron L.; Nguyen, Simone P. | Intra-Individual and Cross-Partner Associations Between the Five Facets of Mindfulness and Relationship Satisfaction | Yes | Yes | No |
| MacDonald, Helen Z.; Baxter, Elizabeth E. | Mediators of the Relationship Between Dispositional Mindfulness and Psychological Well-Being in Female College Students | Yes | No | No |
| MacDonald, Helen Z.; Price, Jennifer L. | Emotional Understanding: Examining Alexithymia as a Mediator of the Relationship Between Mindfulness and Empathy | Yes | No | No |
| Malinowski, Peter; Moore, Adam W.; Mead, Bethan R.; Gruber, Thomas | Mindful Aging: The Effects of Regular Brief Mindfulness Practice on Electrophysiological Markers of Cognitive and Affective Processing in Older Adults | Yes | Yes | No |
| Manuel, Jacob A.; Somohano, Vanessa C.; Bowen, Sarah | Mindfulness Practice and Its Relationship to the Five-Facet Mindfulness Questionnaire | Yes | Yes | No |
| Medvedev, Oleg N.; Siegert, Richard J.; Kersten, Paula; Krageloh, Christian U. | Improving the Precision of the Five Facet Mindfulness Questionnaire Using a Rasch Approach | Yes | Yes | Yes |
| Morgan, Theresa A.; Dalrymple, Kristy; Multach, Matthew; Zimmerman, Mark | Relations Between Mindfulness Processes, Psychiatric Symptoms, and Functioning in Psychiatric and Pre-bariatric Surgery Outpatients | Yes | No | No |
| Parsons, E. Marie; Luebbe, Aaron M.; Clerkin, Elise M. | Testing the Relationship Between Social Anxiety Schemas, Mindfulness Facets, and State and Trait Social Anxiety Symptoms | Yes | No | No |
| Potharst, Eva S.; Aktar, Evin; Rexwinkel, Marja; Rigterink, Margo; Bogels, Susan M. | Mindful with Your Baby: Feasibility, Acceptability, and Effects of a Mindful Parenting Group Training for Mothers and Their Babies in a Mental Health Context | Yes | No | No |
| Reynolds, Lisa M.; Bissett, Ian P.; Porter, David; Consedine, Nathan S. | A Brief Mindfulness Intervention Is Associated with Negative Outcomes in a Randomised Controlled Trial Among Chemotherapy Patients | Yes | Yes | No |
| Rosenstreich, Eyal; Ruderman, Lital | A Dual-Process Perspective on Mindfulness, Memory, and Consciousness | Yes | No | No |
| Sala, Margarita; Levinson, Cheri A. | A Longitudinal Study on the Association Between Facets of Mindfulness and Disinhibited Eating | Yes | No | No |
| Sanso, Noemi; Galiana, Laura; Cebolla, Ausias; Oliver, Amparo; Benito, Enric; Ekman, Eve | Cultivating Emotional Balance in Professional Caregivers: a Pilot Intervention | Yes | No | No |
| Stjernsward, Sigrid; Hansson, Lars | Effectiveness and Usability of a Web-Based Mindfulness Intervention for Families Living with Mental Illness | Yes | Yes | No |
|  | **Totals** | **33 out 36 (92%)** | **15 out of 36 (42%)** | **2 out of 36 (6%)** |

*Note.* All articles were published in the journal *Mindfulness* in 2017, per Web of Science.

Table S2

*Loadings in Five-Factor Exploratory Factor Analysis in Primary Sample*

| **Facet** | **Item** | **Factor Loading** | | | | |
| --- | --- | --- | --- | --- | --- | --- |
| **Factor 1** | **Factor 2** | **Factor 3** | **Factor 4** | **Factor 5** |
| Acting with awareness | 5 | - | - | +0.79 | - | - |
|  | 8 | - | - | +0.83 | - | - |
|  | 13 | - | - | +0.85 | - | - |
|  | 18 | - | - | +0.74 | - | - |
|  | 23 | - | - | +0.73 | - | - |
|  | 28 | - | - | +0.81 | - | - |
|  | 34 | - | - | +0.78 | - | - |
|  | 38 | - | - | +0.85 | - | - |
| Describing | 2 | - | +0.87 | - | - | - |
|  | 7 | - | +0.88 | - | - | - |
|  | 12 | - | +0.80 | - | - | - |
|  | 16 | - | +0.80 | - | - | - |
|  | 22 | +0.22 | +0.68 | - | - | - |
|  | 27 | - | +0.76 | - | - | - |
|  | 32 | - | +0.78 | - | - | - |
|  | 37 | - | +0.86 | - | - | - |
| Nonjudging | 3 | +0.81 | - | - | - | - |
|  | 10 | +0.82 | - | - | - | - |
|  | 14 | +0.79 | - | - | - | - |
|  | 17 | +0.82 | - | - | - | - |
|  | 25 | +0.86 | - | - | - | - |
|  | 30 | +0.88 | - | - | - | - |
|  | 35 | +0.79 | - | - | - | - |
|  | 39 | +0.80 | - | - | - | - |
| Nonreactivity | 4 | - | - | - | - | +0.55 |
|  | 9 | - | - | - | - | +0.60 |
|  | 19 | - | - | - | - | +0.60 |
|  | 21 | - | - | - | - | +0.61 |
|  | 24 | - | - | - | - | +0.56 |
|  | 29 | - | - | - | - | +0.81 |
|  | 33 | - | - | - | - | +0.75 |
| Observing | 1 | - | - | - | +0.75 | - |
|  | 6 | - | - | - | +0.75 | - |
|  | 11 | - | - | - | +0.64 | - |
|  | 15 | - | - | - | +0.90 | - |
|  | 20 | - | - | - | +0.75 | - |
|  | 26 | - | - | - | +0.67 | - |
|  | 31 | - | - | - | +0.70 | - |
|  | 36 | −0.23 | +0.37 | - | +0.45 | - |

*Note*. Loadings below 0.20 are omitted (“-“) for readability. *N* = 522.

Table S3

*Loadings in Five-Factor Exploratory Factor Analysis in Replication Sample*

| **Facet** | **Item** | **Factor Loading** | | | | |
| --- | --- | --- | --- | --- | --- | --- |
| **Factor 1** | **Factor 2** | **Factor 3** | **Factor 4** | **Factor 5** |
| Acting with awareness | 5 | - | +0.80 | - | - | - |
|  | 8 | - | +0.73 | - | - | - |
|  | 13 | - | +0.79 | - | - | - |
|  | 18 | - | +0.61 | - | - | - |
|  | 23 | - | +0.47 | - | - | +0.31 |
|  | 28 | - | +0.45 | - | - | +0.28 |
|  | 34 | - | +0.42 | - | - | +0.23 |
|  | 38 | - | +0.66 | +0.21 | - | +0.25 |
| Describing | 2 | +0.69 | - | - | - | - |
|  | 7 | +0.71 | - | - | - | - |
|  | 12 | +0.68 | +0.21 | -0.23 | - | - |
|  | 16 | +0.67 | +0.21 | - | - | - |
|  | 22 | +0.48 | +0.24 | - | - | +0.25 |
|  | 27 | +0.55 | - | - | +0.22 | - |
|  | 32 | +0.68 | - | - | +0.22 | - |
|  | 37 | +0.67 | - | - | +0.21 | - |
| Nonjudging | 3 | - | - | - | +0.23 | +0.62 |
|  | 10 | - | - | - | - | +0.51 |
|  | 14 | - | - | - | - | +0.54 |
|  | 17 | - | - | - | - | +0.56 |
|  | 25 | - | - | - | - | +0.61 |
|  | 30 | - | - | - | - | +0.78 |
|  | 35 | - | - | - | - | +0.77 |
|  | 39 | - | - | - | - | +0.75 |
| Nonreactivity | 4 | +0.22 | - | - | +0.41 | +0.22 |
|  | 9 | - | +0.22 | +0.22 | +0.43 | - |
|  | 19 | - | - | +0.29 | +0.53 | - |
|  | 21 | - | - | - | +0.55 | - |
|  | 24 | - | - | - | +0.52 | - |
|  | 29 | - | - | - | +0.77 | - |
|  | 33 | - | - | - | +0.62 | - |
| Observing | 1 | - | - | +0.62 | - | - |
|  | 6 | - | - | +0.72 | - | - |
|  | 11 | - | - | +0.51 | - | - |
|  | 15 | - | - | +0.81 | - | - |
|  | 20 | - | - | +0.60 | - | - |
|  | 26 | - | - | +0.60 | - | - |
|  | 31 | +0.27 | - | +0.56 | - | - |
|  | 36 | +0.30 | - | +0.35 | +0.24 | -0.24 |

*Note*. Loadings below 0.20 are omitted (“-“) for readability. *N* = 324.

Table S4

*Tests of Extrinsic Convergent Validity of Facets of FFMQ-39, FFMQ-24, and FFMQ-23 in Replication Sample*

| **Form** | **Facet** | **Criterion** | ***N*** | ***r*(full,crit)** | ***r*(short,crit)** | ***r*(full,short)** | **Cohen’s *q*** | ***p*** |
| --- | --- | --- | --- | --- | --- | --- | --- | --- |
| FFMQ-24 (Bohlmeijer) | Acting with awareness | Craving | 414 | -0.37 | -0.33 | 0.94 | -0.04 | ns |
|  |  | Dependence severity | 402 | -0.23 | -0.24 | 0.93 | +0.01 | ns |
|  |  | Drinking problems | 414 | -0.19 | -0.16 | 0.94 | -0.03 | ns |
|  |  | Acceptance | 400 | -0.03 | -0.04 | 0.94 | +0.01 | ns |
|  | Describing | Craving | 411 | -0.20 | -0.19 | 0.96 | -0.00 | ns |
|  |  | Dependence severity | 400 | -0.13 | -0.14 | 0.96 | +0.00 | ns |
|  |  | Drinking problems | 411 | -0.10 | -0.11 | 0.96 | +0.00 | ns |
|  |  | Acceptance | 394 | 0.11 | 0.09 | 0.96 | +0.02 | ns |
|  | Nonjudging | Craving | 402 | -0.25 | -0.25 | 0.97 | +0.00 | ns |
|  |  | Dependence severity | 390 | -0.24 | -0.24 | 0.96 | -0.01 | ns |
|  |  | Drinking problems | 402 | -0.19 | -0.18 | 0.97 | -0.01 | ns |
|  |  | Acceptance | 387 | -0.07 | -0.10 | 0.96 | +0.02 | ns |
|  | Nonreactivity | Craving | 418 | -0.17 | -0.19 | 0.96 | +0.03 | ns |
|  |  | Dependence severity | 404 | 0.00 | -0.02 | 0.95 | +0.02 | ns |
|  |  | Drinking problems | 418 | -0.01 | -0.04 | 0.96 | +0.02 | ns |
|  |  | Acceptance | 402 | 0.30 | 0.30 | 0.96 | +0.01 | ns |
|  | Observing | Craving | 415 | -0.02 | -0.01 | 0.92 | -0.00 | ns |
|  |  | Dependence severity | 401 | 0.03 | -0.04 | 0.92 | +0.07 | p < .05 |
|  |  | Drinking problems | 415 | 0.09 | 0.05 | 0.92 | +0.03 | ns |
|  |  | Acceptance | 396 | 0.31 | 0.29 | 0.92 | +0.02 | ns |
| FFMQ-23 (Burzler) | Acting with awareness | Craving | 414 | -0.37 | -0.35 | 0.91 | -0.01 | ns |
|  |  | Dependence severity | 402 | -0.23 | -0.19 | 0.91 | -0.04 | ns |
|  |  | Drinking problems | 414 | -0.19 | -0.18 | 0.91 | -0.01 | ns |
|  |  | Acceptance | 400 | -0.03 | -0.00 | 0.91 | -0.03 | ns |
|  | Describing | Craving | 411 | -0.20 | -0.11 | 0.91 | -0.08 | p < .05 |
|  |  | Dependence severity | 400 | -0.13 | -0.06 | 0.92 | -0.07 | p < .05 |
|  |  | Drinking problems | 411 | -0.10 | -0.04 | 0.91 | -0.06 | p < .05 |
|  |  | Acceptance | 394 | 0.11 | 0.16 | 0.92 | -0.05 | ns |
|  | Nonjudging | Craving | 402 | -0.25 | -0.20 | 0.93 | -0.06 | p < .05 |
|  |  | Dependence severity | 390 | -0.24 | -0.20 | 0.93 | -0.05 | ns |
|  |  | Drinking problems | 402 | -0.19 | -0.19 | 0.93 | -0.00 | ns |
|  |  | Acceptance | 387 | -0.07 | -0.03 | 0.93 | -0.05 | ns |
|  | Observing | Craving | 415 | -0.02 | -0.01 | 0.92 | -0.00 | ns |
|  |  | Dependence severity | 401 | 0.03 | -0.04 | 0.92 | +0.07 | p < .05 |
|  |  | Drinking problems | 415 | 0.09 | 0.05 | 0.92 | +0.03 | ns |
|  |  | Acceptance | 396 | 0.31 | 0.29 | 0.92 | +0.02 | ns |

*Note*. *r*(full,crit) = correlation between FFMQ-39 facet and criterion variable; *r*(short,crit) = correlation between short form (i.e., FFMQ-24 or FFMQ-23) facet and criterion variable; *r*(full,short) = correlation between FFMQ-39 facet and short form facet; *p* = is p-value for test of difference between *r*(full,crit) and *r*(short,crit) using the Williams (1959) method. All *p*-values in extrinsic convergent validity analyses were corrected with the False Discovery Rate correction (Benjamini & Hochberg, 1995). Craving was measured by Penn Alcohol/Drug Craving Scale (Flannery, Volpicelli, & Petinnati, 2006). Dependence severity was measured by the Severity of Dependence Scale (Stockwell, Murphy, & Hodgson, 2010). Drinking problems were measured by the Short Index of Problems (Feinn, Tennen, & Kranzler, 2006). Acceptance was measured via the Acceptance and Action Questionnaire (Bond et al., 2011).

Figure S1

*Parallel Analysis of Individual Facets of FFMQ*


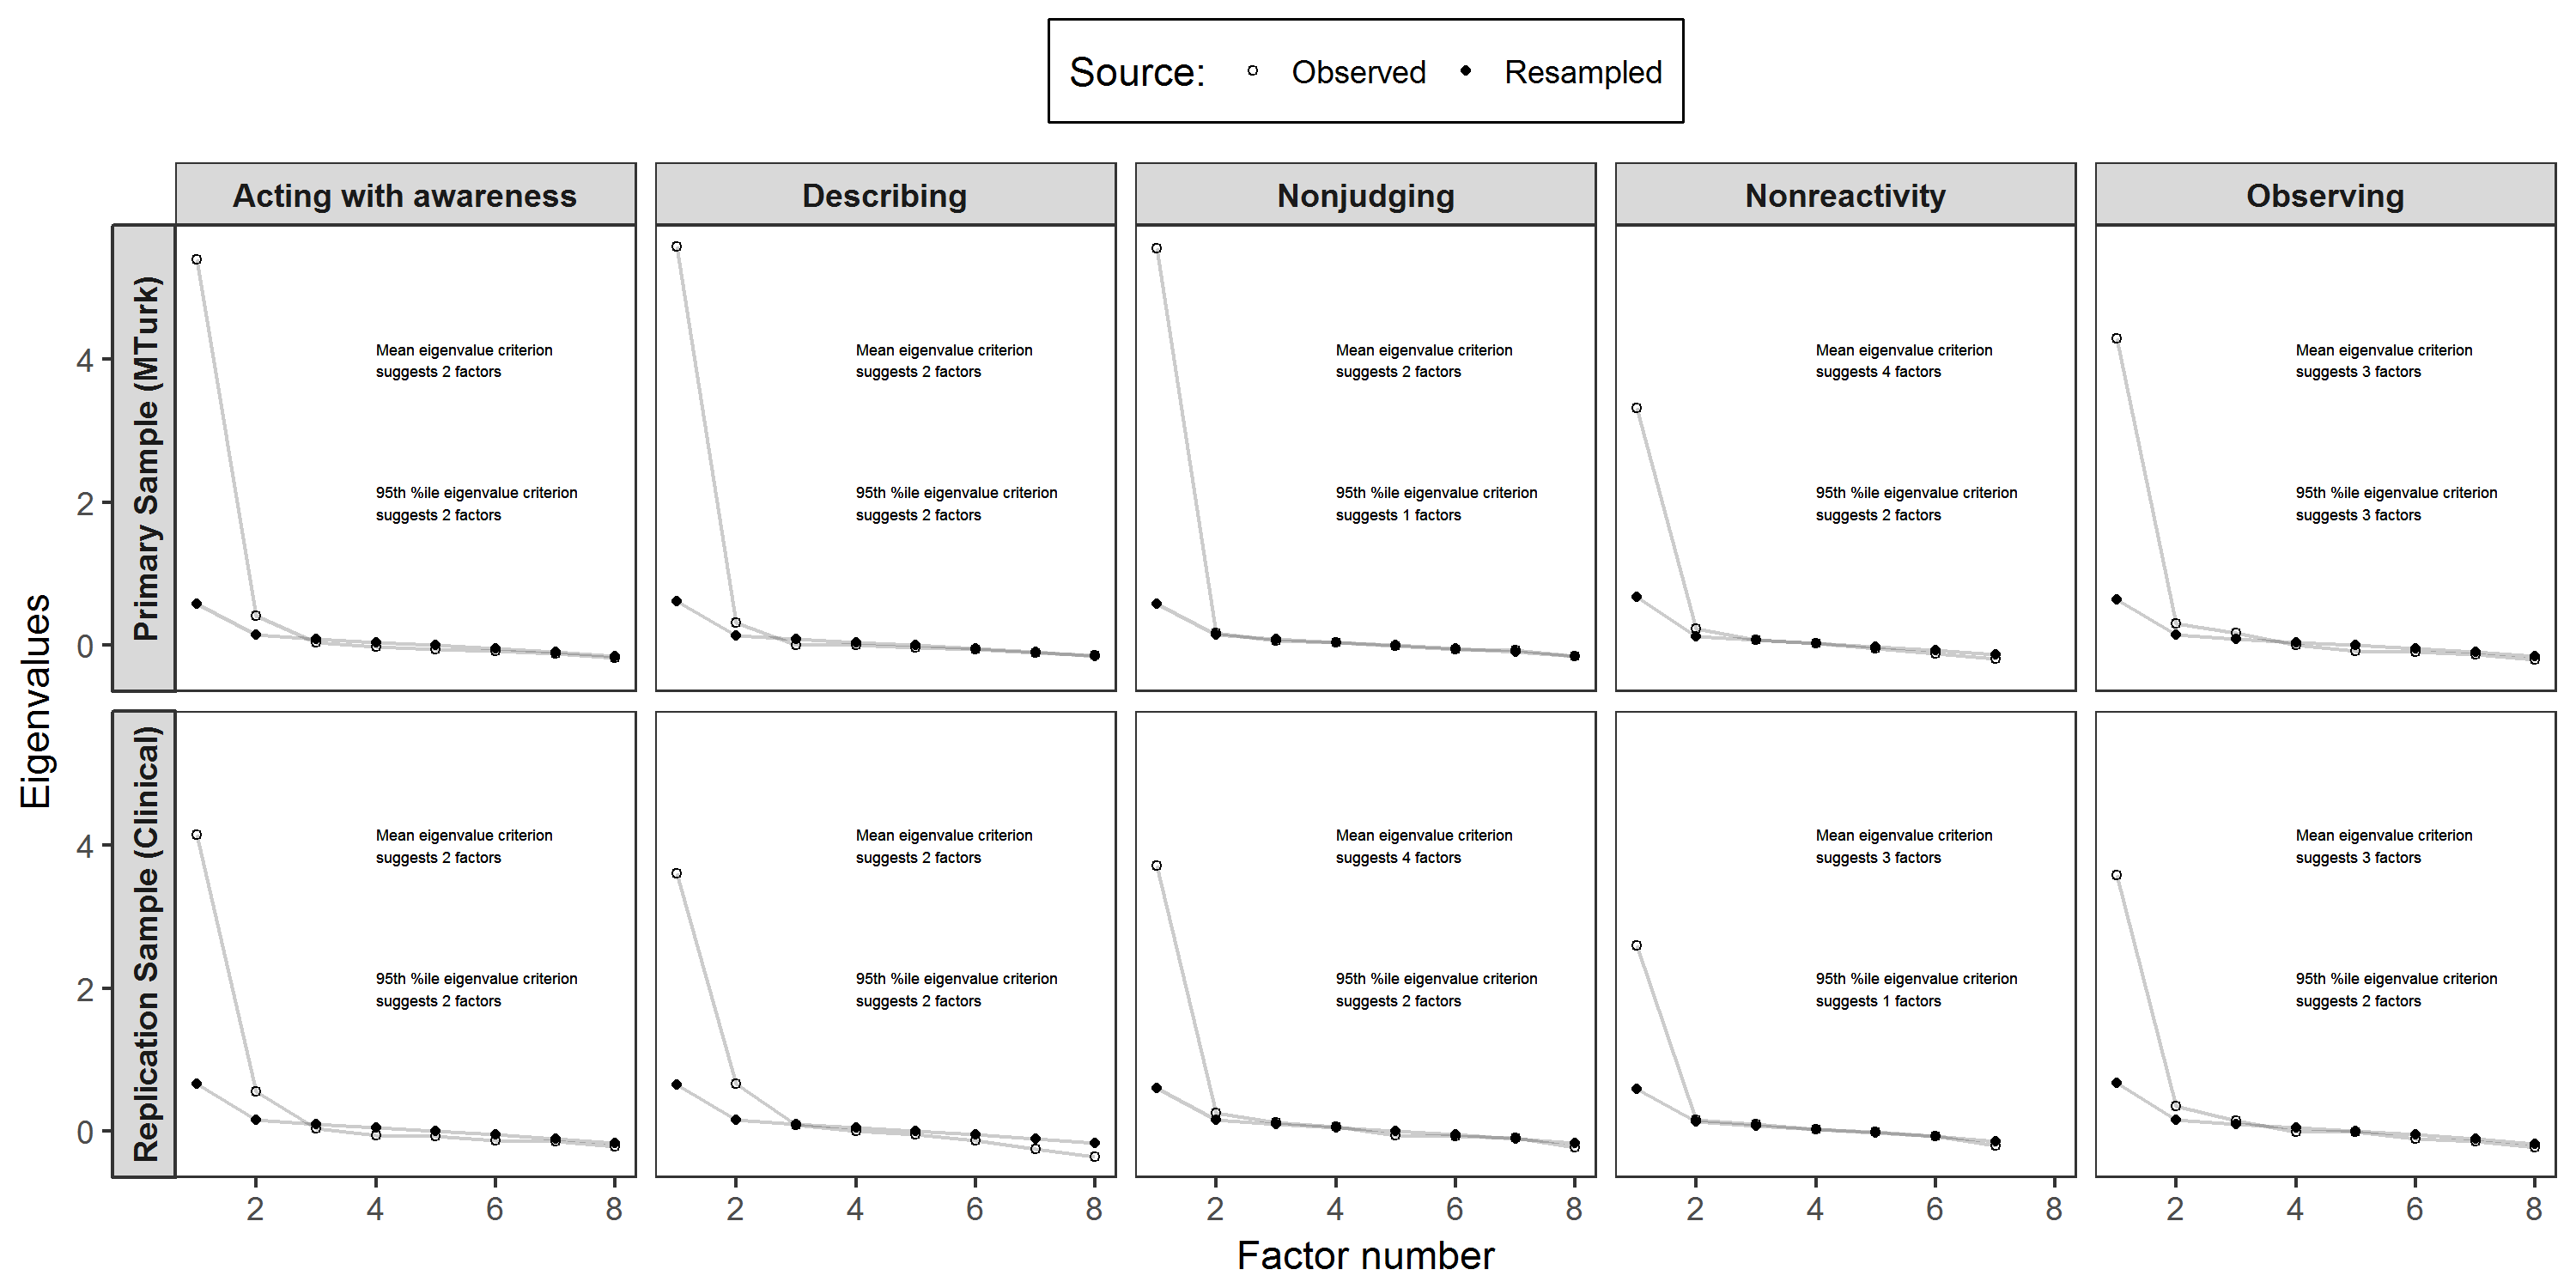


*Note.* Each panel indicates eigenvalues for a specific combination of facet (columns) and sample (rows). “Observed” points are the eigenvalues observed in the dataset. “Resampled” points are the mean eigenvalues observed in 100 bootstrap resamples, as described in methods.
